# Supplementary material for: Atomically ultrathin RhCo alloy nanosheet aggregates for efficient water electrolysis in broad pH range
Source: Royal Society of Chemistry journal article supplement (doi:10.1039/c9ta05334d), 2019-01-01
Supplement: c9ta05334d1.pdf [file c9ta05334d1.pdf]

## Electronic Supplementary Material

### **Atomically ultrathin RhCo alloy nanosheets aggregates for efficient water electrolysis in broad pH range**

Yue Zhao,<sup>‡a</sup> Juan Bai,<sup>‡a</sup> Xin-Ru Wu,<sup>a</sup> Pei Chen,<sup>a</sup> Pu-Jun Jin,<sup>a</sup> Hong-Chang Yao,<sup>b</sup> and  
Yu Chen<sup>\*a</sup>

*<sup>a</sup> a. Key Laboratory of Macromolecular Science of Shaanxi Province, Key Laboratory of Applied Surface and Colloid Chemistry (Ministry of Education), Shaanxi Key Laboratory for Advanced Energy Devices, School of Materials Science and Engineering, Shaanxi Normal University, Xi'an 710119, PR China*

*<sup>b</sup> College of Chemistry and Molecular Engineering, Zhengzhou University, Zhengzhou 450001, PR China*

\* Corresponding author

E-mail: ndchenyu@gmail.com (Y. Chen).

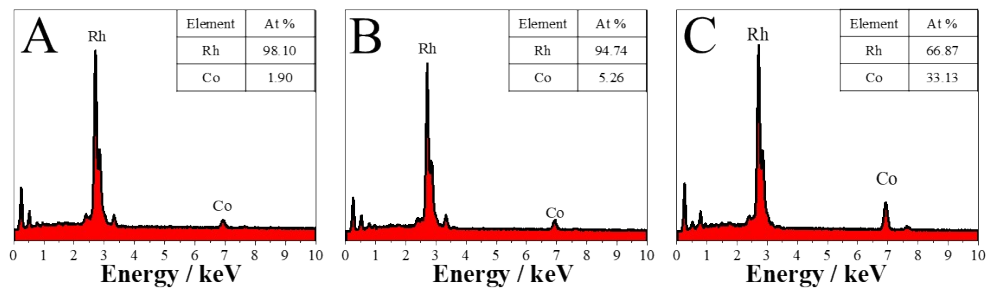

**Fig. S1** EDX spectra of RhCo-ANAs obtained at (A) 160 °C, (B) 200 °C, and 240 °C, respectively.

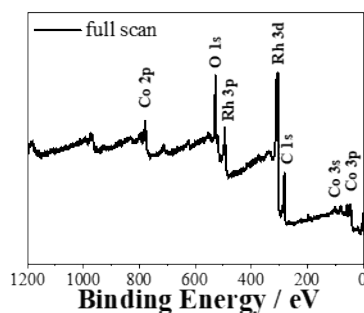

**Fig. S2** XPS survey spectrum of RhCo-ANAs.

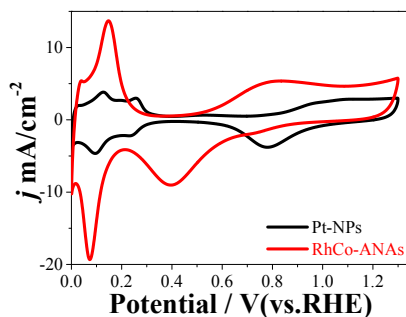

**Fig. S3** CV curves of RhCo-ANAs and Pt-NPs in Ar-saturated 0.5 M H<sub>2</sub>SO<sub>4</sub> solution at 50 mV s<sup>-1</sup>.

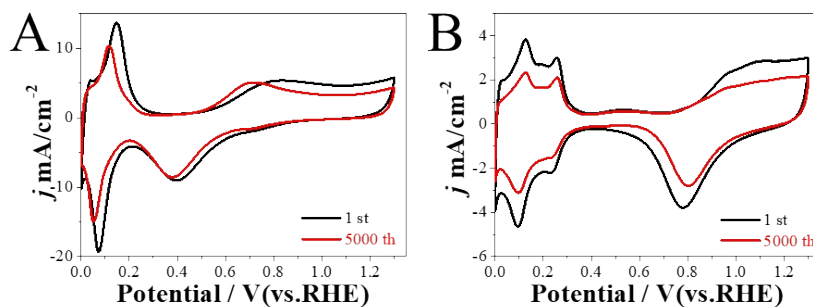

**Fig. S4** CV curves of (A) RhCo-ANAs and (B) Pt-NPs in Ar-saturated 0.5 M H<sub>2</sub>SO<sub>4</sub> solution at 50 mV s<sup>-1</sup> before and after 5 000 scan cycles.

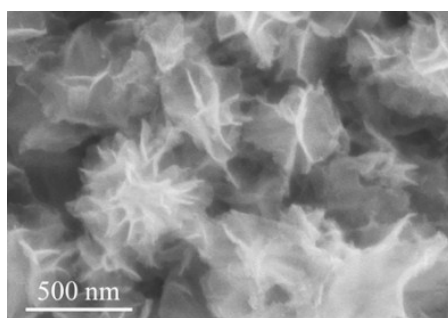

**Fig. S5** SEM image of RhCo-ANAs after 5 000 scan cycles.

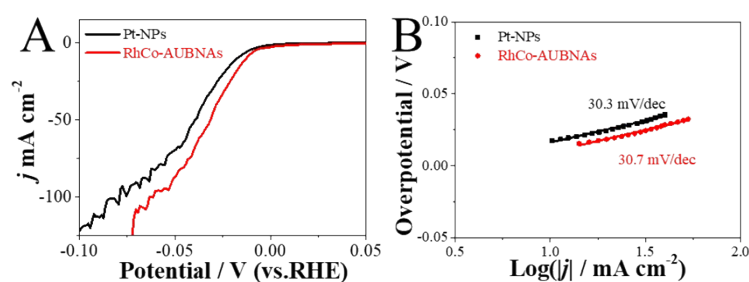

**Fig. S6** (A) HER polarization curves of RhCo-ANAs and Pt-NPs in Ar-saturated 0.5 M  $\text{H}_2\text{SO}_4$  solution at  $5 \text{ mV s}^{-1}$ . (B) Tafel plots of the HER at RhCo-ANAs and Pt-NPs in Ar-saturated 0.5 M  $\text{H}_2\text{SO}_4$  solution.

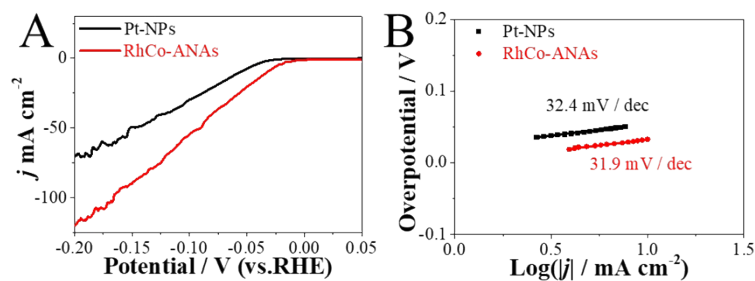

**Fig. S7** (A) HER polarization curves of RhCo-ANAs and Pt-NPs in Ar-saturated 1.0 M KOH solution at  $5 \text{ mV s}^{-1}$ . (B) Tafel plots of HER at RhCo-ANAs and Pt-NPs in Ar-saturated 1.0 M KOH solution.

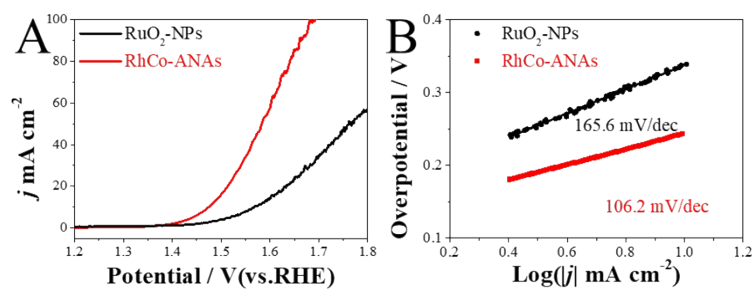

**Fig. S8** (A) OER polarization curves of RhCo-ANAs and  $\text{RuO}_2$ -NPs in Ar-saturated 0.5 M  $\text{H}_2\text{SO}_4$  solution at  $5 \text{ mV s}^{-1}$  and (B) Tafel plots of RhCo-ANAs and  $\text{RuO}_2$ -NPs.

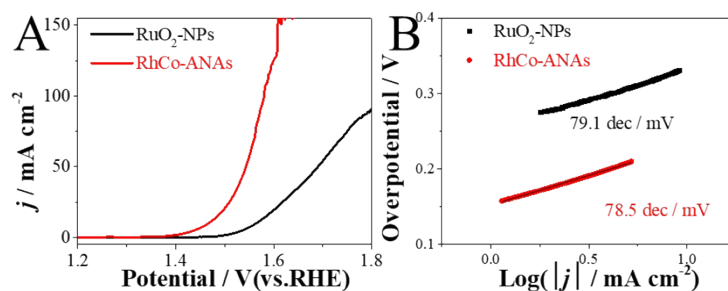

**Fig. S9** (A) OER polarization curves of RhCo-ANAs and RuO<sub>2</sub>-NPs in Ar-saturated 1.0 M KOH solution at 5 mV s<sup>-1</sup> and (B) Tafel plots of RhCo-ANAs and RuO<sub>2</sub>-NPs.

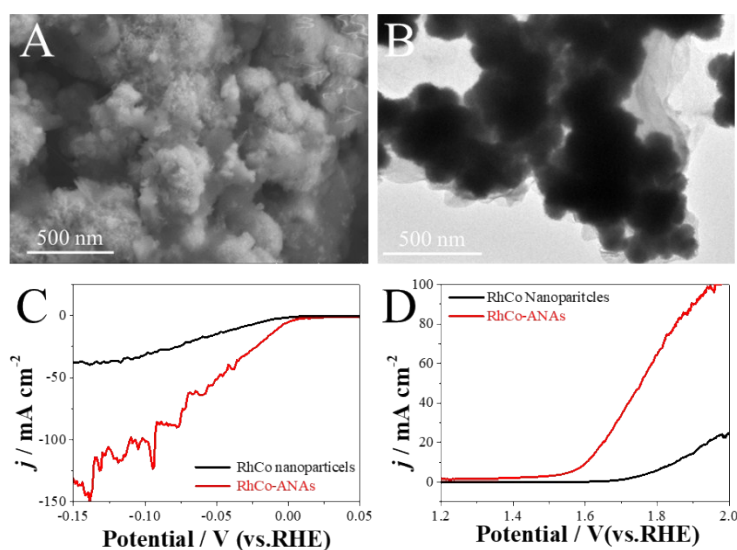

**Fig. S10.** (A) SEM and (B) TEM images of spherical RhCo nanoparticles. (C) HER polarization curves of RhCo-ANAs and spherical RhCo nanoparticles in Ar-saturated 1.0 M PBS solution at 5 mV s<sup>-1</sup>. (D) OER polarization curves of RhCo-ANAs and spherical RhCo nanoparticles in Ar-saturated 1.0 M PBS solution at 5 mV s<sup>-1</sup>. Herein, spherical RhCo nanoparticles are obtained by using RhCl<sub>3</sub> and CoCl<sub>2</sub> as reaction precursors and HCHO as reducing agent at 240 °C for 6 h.

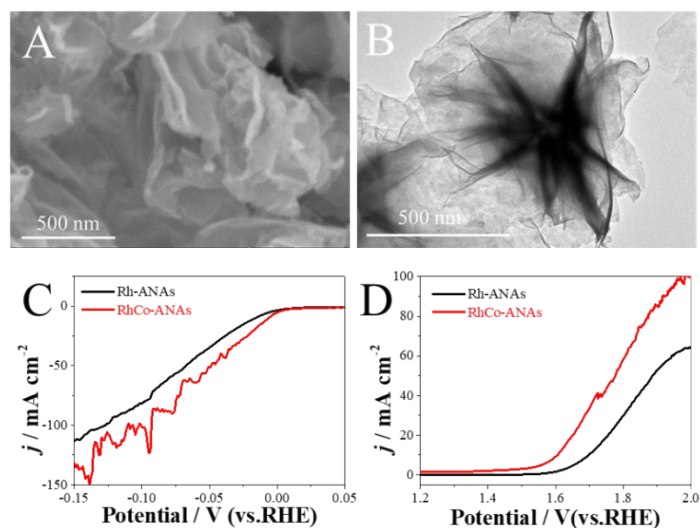

**Fig. S11** (A) SEM and (B) TEM images of Rh-ANAs. (C) HER polarization curves of RhCo-ANAs and monometallic Rh-ANAs in Ar-saturated 1.0 M PBS solution at 5 mV s<sup>-1</sup>. (D) OER polarization curves of RhCo-ANAs and monometallic Rh-ANAs in Ar-saturated 1.0 M PBS solution at 5 mV s<sup>-1</sup>. Herein, Rh-ANAs was obtained by selecting reaction temperature at 160 °C (Fig. S1A)

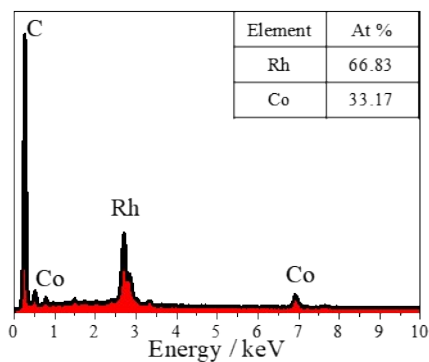

**Fig. S12** EDX spectrum of RhCo-ANAs/CF.

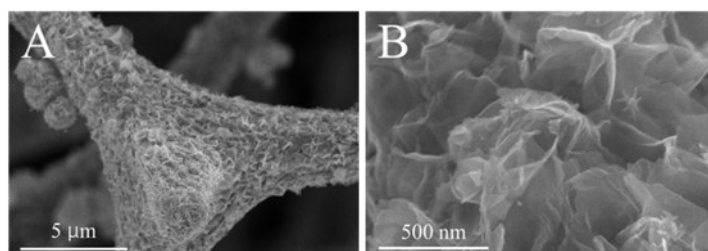

**Fig. S13** SEM images of RhCo-ANAs/CF after the stability test (A) SEM images of RhCo-ANAs/CF, (B) magnified SEM images of RhCo-ANAs/CF.

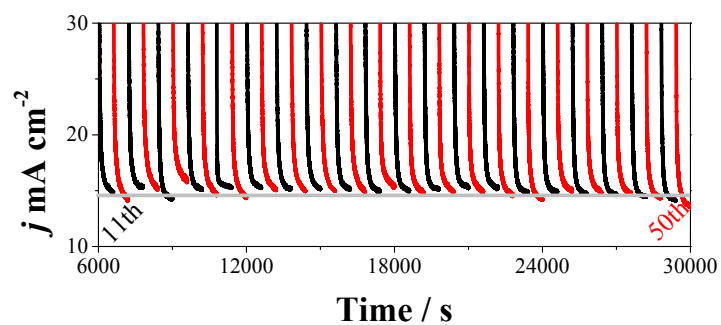

**Fig. S14** Chronoamperometric curves of symmetric RhCo-ANAs/CF||RhCo-ANAs/CF electrolyzer in 1.0 M PBS solution in periodically switching cathode and anode mode. Applied voltage: 1.65 V; Switching time interval: 10 min.

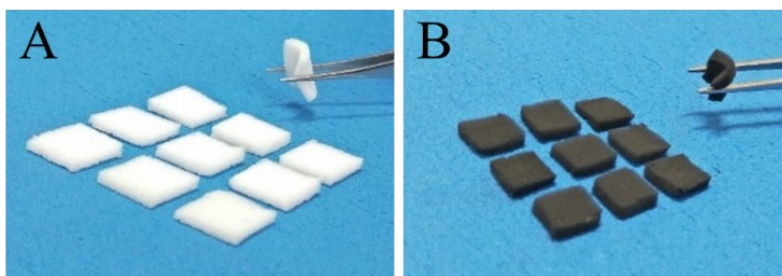

**Fig. S15** The photograph of (A) sponge scouring pad and (B) CF with flexible property.
